# Supplementary material
Source: PubMed Central journal article supplement (PMC6280796)

Original source data for Figure

The detected signals are all from the same lysates from one of three independent experiments. The published lanes in the figure are highlighted. Other signals on the membrane are from other samples that were run on the same gel, but are not relevant for the publication figure. After first probeings, the membranes were not stripped, but a second probing for a sufficiently distant target protein performed. Marker lanes were imaged in white light before substrate solution was added. Different signal intensities required either normal sensitivity substrate (West Pico) or high sensitivity substrate (West femto)

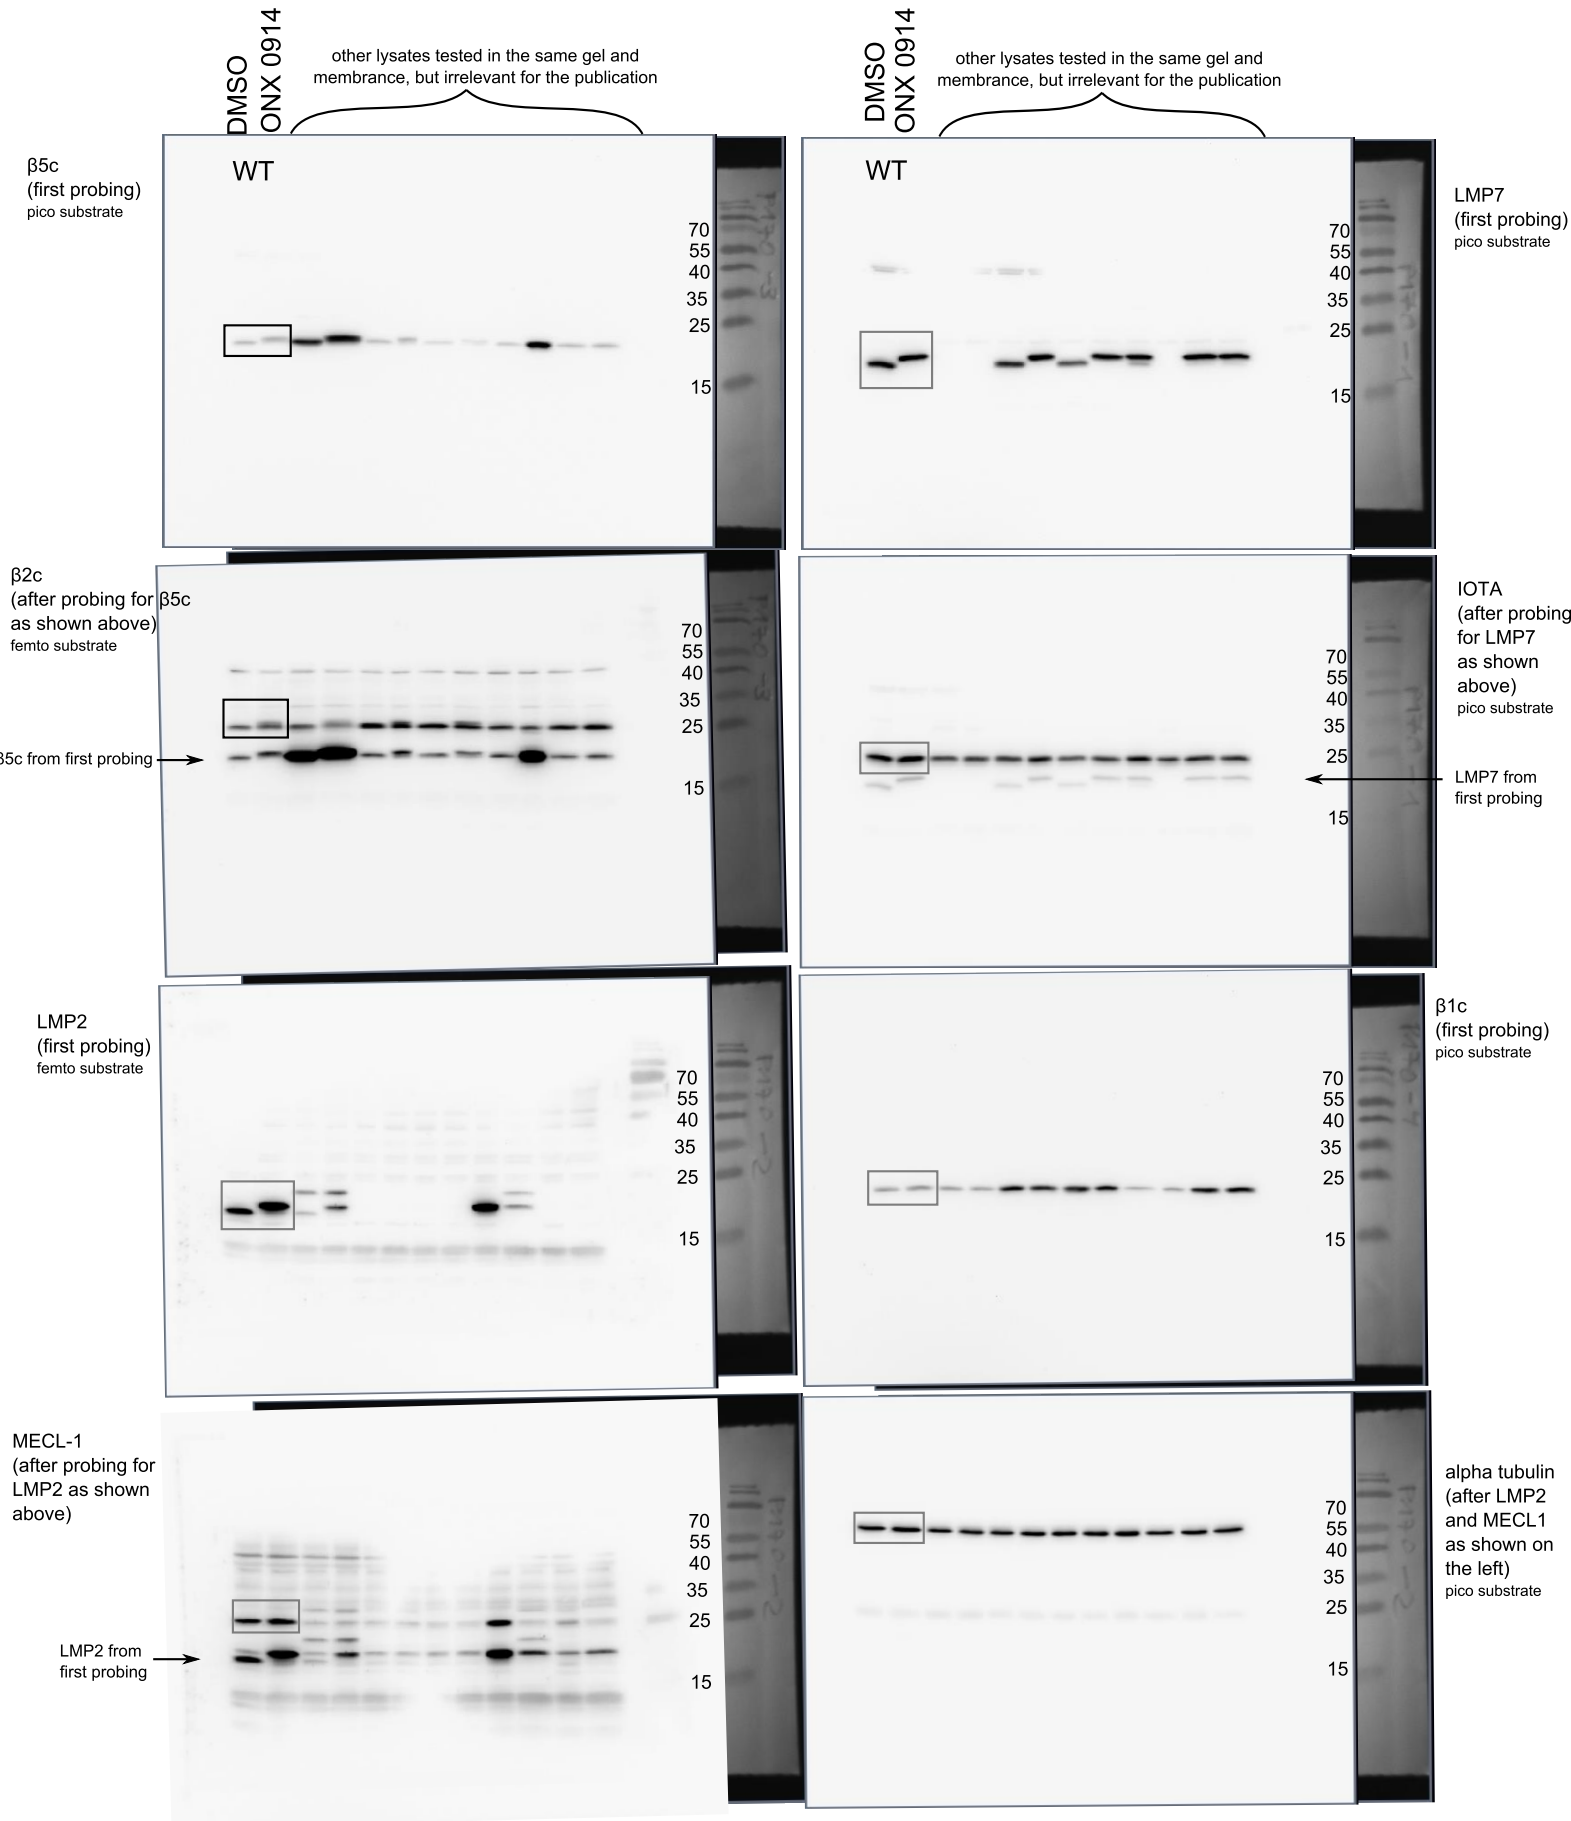

Supplement: EMBR-19-e46512-s002.pdf [file EMBR-19-e46512-s002.pdf]
