# Supplementary material
Source: PubMed Central journal article supplement (PMC6280796)

## Original source data

All blots were done with the same amount of lysate from the same experiment loaded to 14 % SDS PAGE gels run in parallel, blots were not stripped, but probed for sufficiently distant targets again

Probing 1:

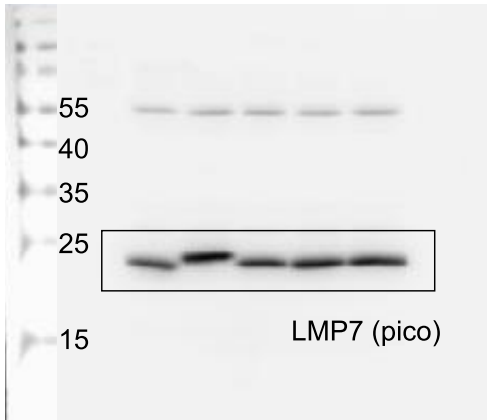

Probing 2 (without stripping):

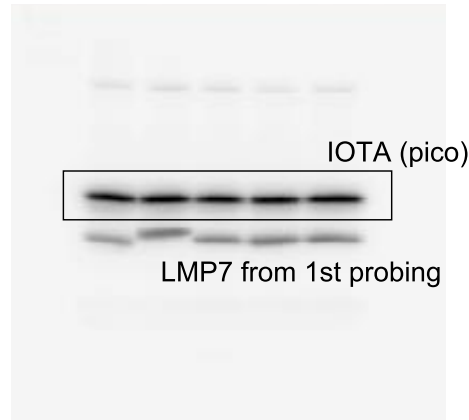

pico: West pico ECL kit for detection  
femto: West femto ECL kit for detection

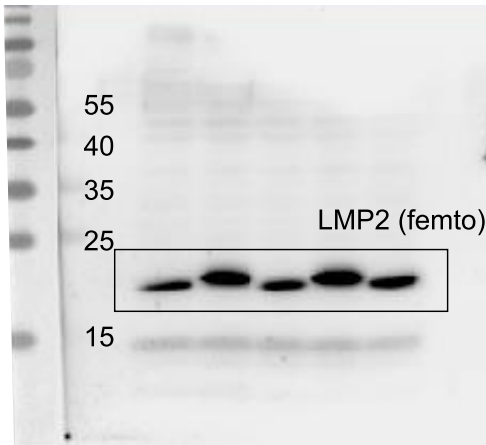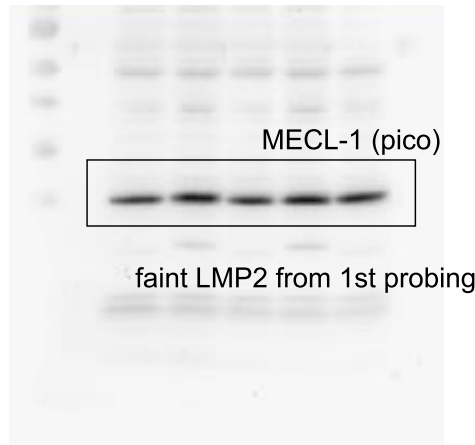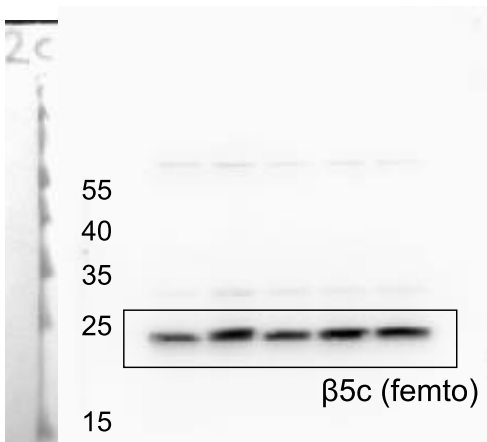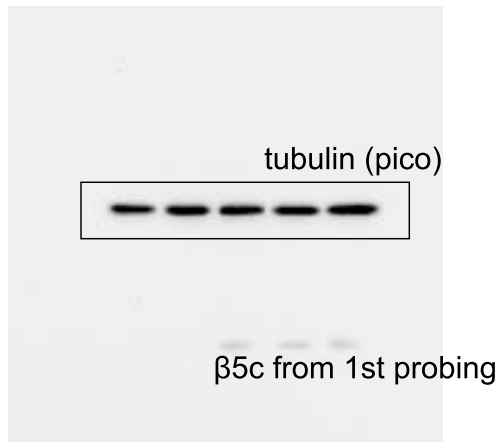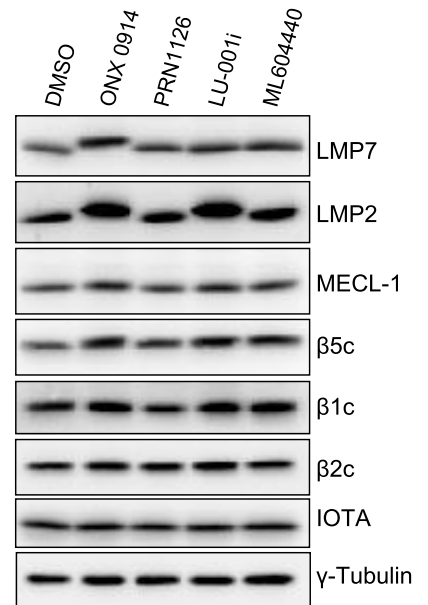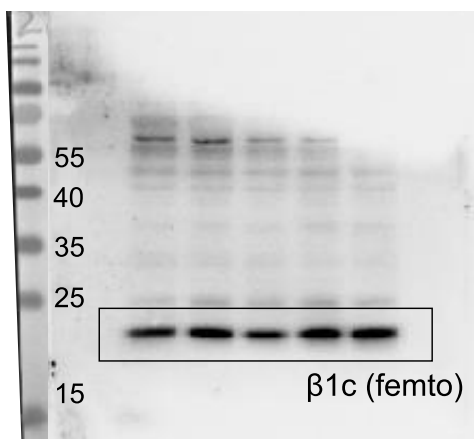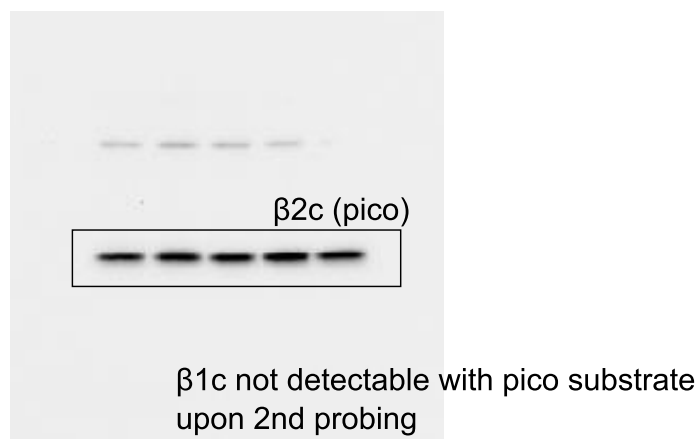

Supplement: EMBR-19-e46512-s003.pdf [file EMBR-19-e46512-s003.pdf]
